# Supplementary material for: Managing a Single-Product Assemble-to-Order System with Technology Innovations
Source: Atypon-hosted journal article supplement (doi:10.1287/mnsc.1070.0709), 2007-09-01
Supplement: mnsc.1070.0709-sm-ec.pdf [file mnsc.1070.0709-sm-ec.pdf]

Electronic Companion—“Managing a Single-Product Assemble-to-Order System with Technology Innovations” by Susan H. Xu and Zhaolin Li, *Management Science*, DOI 10.1287/mnsc.1070.0709.

## Online Supplement

### Appendix A. Lemma 1

LEMMA 1. (a)  $\Delta g_i(y)$  is a concave function if  $a_i + b_i \geq 0$  and a convex function if  $a_i + b_i \leq 0$ .  
 (b) Let  $\beta_i$  be the largest value of  $y$  such that  $\Delta g_i(y) = 0$ , that is,  $\beta_i$  is the largest solution of

$$\frac{b_i}{a_i + b_i} = \frac{E[\min(y, D)]}{y}, \quad (\text{EC.A1})$$

where we let  $\beta_i \equiv \infty$  if  $\Delta g_i(y) \geq (\leq) 0$  for all  $y \geq 0$ . Then  $\Delta g_i(y) \geq (\leq) 0$  if and only if  $a_i \geq 0$  ( $a_i < 0$ ) and  $y \leq \beta_i$ .

(c) If  $a_i \geq 0$  ( $a_i < 0$ ), then  $\Delta g_i(y) < 0$  ( $> 0$ ) and is decreasing (increasing) when  $y > \beta_i$ .

PROOF.

(a) From (4.12), the second derivative of  $\Delta g_i(y)$  satisfies

$$\frac{\partial^2 \Delta g_i(y)}{\partial y^2} = -(a_i + b_i)f(y), \quad (\text{EC.A2})$$

which is concave (convex) in  $y$  if and only if  $a_i + b_i \geq 0$  ( $a_i + b_i \leq 0$ ).

(b) If  $a_i \geq 0$  and  $b_i \leq 0$  ( $a_i < 0$  and  $b_i > 0$ ), then  $\Delta g_i(y) \geq 0$  ( $\Delta g_i(y) \leq 0$ ) for all  $y$ . Thus,  $\beta_i = \infty$  and our claim holds true trivially. If  $a_i \geq 0$  and  $b_i \geq 0$  ( $a_i < 0$  and  $b_i < 0$ ), then  $\Delta g_i(y)$  is concave (convex), as shown in (a). Our claim follows immediately from the definition of  $\beta_i$ .

(c) This is a direct consequence of (a) and (b).  $\square$

### Appendix B. An Example of Interval Partitioning Algorithm

EXAMPLE 1. We illustrate IPA using a 5-component system with the data showing in Table EC.1. Let demand  $D$  be an Erlang random variable with mean 4 and variance 8. Discount factor  $\lambda$  is set at 0.9. We assume  $d_i = 1$ , so the innovation time for each component is geometrically distributed with innovation rate given in the fifth column of Table EC.1. The salvage value of a Generation 2 (G2) technology is set at  $c_i(2) \equiv 0$ .

The result of IPA is reported in Table EC.2, which shows that  $\{\beta_i\}$  partition  $[0, \infty)$  into 4 subintervals. In each subinterval, we select the technology of each component using (4.15) or (4.16), and determine whether the resultant configuration is locally optimal by Step 3 of IPA. Here, we have a unique locally, and hence globally, optimal solution  $\mathbf{k}^* = \{1, 1, 0, 0, 1\}$  and  $y^* = 5.63$ . IPA allows us to evaluate only 4 dominant configurations, rather than  $2^5 = 32$  alternatives, to determine the optimal configuration and optimal inventory.

### Appendix C. Proof of Theorem 1

(a) Consider two consecutive subintervals  $[\beta_{(l)}, \beta_{(l+1)})$  and  $[\beta_{(l+1)}, \beta_{(l+2)})$  and their corresponding dominant configurations  $\mathbf{k}^{(l)}$  and  $\mathbf{k}^{(l+1)}$ ,  $l = 0, 1, \dots, m - 1$ . Suppose  $\beta_{(l+1)} < \infty$  and  $\beta_{(l+1)} = \beta_i$ . Consider  $a_i \geq 0$  first. As suggested in Step 2 of Algorithm 1, Config- $\mathbf{k}^{(l)}$  and Config- $\mathbf{k}^{(l+1)}$  use the same technology

**Table EC.1 Cost Parameters for Example 1**

| Component | G0 (\$)        |               | G1 (\$)        |               | Innov. prob.<br>$q_i$ |
|-----------|----------------|---------------|----------------|---------------|-----------------------|
|           | Price $r_i(0)$ | Cost $c_i(0)$ | Price $r_i(1)$ | Cost $c_i(1)$ |                       |
| 1         | 250            | 120           | 170            | 50            | 0.25                  |
| 2         | 100            | 40            | 82             | 20            | 0.25                  |
| 3         | 210            | 163           | 140            | 100           | 0.1                   |
| 4         | 80             | 40            | 55             | 30            | 0.25                  |
| 5         | 100            | 60            | 73             | 35            | 0.2                   |

for each component except for component  $i$ , where the former uses Generation 0 (G0) and the latter uses Generation 1 (G1). Therefore,

$$[r(\mathbf{k}^{(l)}) - c(\mathbf{k}^{(l)})] - [r(\mathbf{k}^{(l+1)}) - c(\mathbf{k}^{(l+1)})] = a_i \geq 0,$$

$$[c(\mathbf{k}^{(l)}) + H(\mathbf{k}^{(l)})] - [c(\mathbf{k}^{(l+1)}) + H(\mathbf{k}^{(l+1)})] = b_i \geq 0,$$

where the last inequality holds since  $\beta_i < \infty$ . Thus, both the profit margin and overage cost of  $\mathbf{k}^{(l)}$  decrease in  $l$ . Conversely, if  $a_i < 0$ , Config- $\mathbf{k}^{(l)}$  uses G1 and Config- $\mathbf{k}^{(l+1)}$  uses G0 for component  $i$ , but both use the same technology for any other component. Hence, the LHSs of the above expressions are  $-a_i > 0$  and  $-b_i > 0$ , where  $-b_i > 0$  since  $\beta_i < \infty$  means  $b_i < 0$ .

(b) If  $a_i \geq (<)0$ , then from (4.15) and (4.16), one sees that  $k_i^{(l)}$  is increasing (decreasing) on  $l$ ,  $i \in E$ . Consequently,  $\mathbf{k}^{(l)}$  is increasing (decreasing) on  $l$  if  $a_i \geq (<)0$  for all  $i$ .  $\square$

## Appendix D. Lemma 2

Lemma 2 relies on the notion of modularity of a function  $f(x, y)$ , which is defined below.

DEFINITION 2. A function  $f(x, y)$  is called submodular (supermodular) if

$$f(x_2, y_2) - f(x_1, y_2) \leq (\geq) f(x_2, y_1) - f(x_1, y_1), \quad \text{for any } x_1 \geq x_2 \text{ and } y_1 \geq y_2, \quad (\text{EC.D1})$$

or, equivalently,  $f(x_2, y) - f(x_1, y)$  is increasing (decreasing) in  $y$ .

LEMMA 2. (a) Under Assumption A1 (A2),  $g_i(t_i, k_i, y)$  is a submodular (supermodular) function of  $t_i$  and  $y$ , with  $k_i$  fixed. In other words,

$$g_i(t_i, k_i, y) - g_i(t_i + 1, k_i, y) \leq (\geq) g_i(t_i, k_i, y + 1) - g_i(t_i + 1, k_i, y + 1), \quad i \in E. \quad (\text{EC.D2})$$

(b) Under Assumption B1 (B2),  $g_i(t_i, k_i, y)$  is a submodular (supermodular) function of  $t_i$  and  $k_i$ , with  $y$  fixed. In other words,

$$g_i(t_i, 0, y) - g_i(t_i, 1, y) \leq (\geq) g_i(t_i + 1, 0, y) - g_i(t_i + 1, 1, y). \quad (\text{EC.D3})$$

(c) Under Assumption B1 (B2),  $\beta_i(t_i)$  is increasing (decreasing) in  $t_i$ ,  $i \in E$ .

**Table EC.2 The Result of IPA for Example 1**

| Component                                        | $a_i$ | $b_i$ | $\beta_i$ | Dominant intervals and dominant configurations |              |              |                   |
|--------------------------------------------------|-------|-------|-----------|------------------------------------------------|--------------|--------------|-------------------|
|                                                  |       |       |           | [0, 5.03)                                      | [5.03, 5.52) | [5.52, 6.58) | [6.58, $\infty$ ) |
| 1                                                | 10    | 18.6  | 5.03      | 0                                              | 1            | 1            | 1                 |
| 2                                                | -2    | 4     | $\infty$  | 1                                              | 1            | 1            | 1                 |
| 3                                                | 7.5   | 9.1   | 6.58      | 0                                              | 0            | 0            | 1                 |
| 4                                                | 15    | -2.5  | $\infty$  | 0                                              | 0            | 0            | 0                 |
| 5                                                | 2     | 3.2   | 5.52      | 0                                              | 0            | 1            | 1                 |
| $r(\mathbf{k}^{(l)}) - c(\mathbf{k}^{(l)})$ (\$) |       |       |           | 319.5                                          | 309.5        | 307.5        | 300               |
| $c(\mathbf{k}^{(l)}) + H(\mathbf{k}^{(l)})$ (\$) |       |       |           | 113.1                                          | 94.6         | 91.4         | 82.3              |
| $y(\mathbf{k}^{(l)})$                            |       |       |           | 5.27                                           | 5.57         | 5.63         | 5.80              |
| Local optimum?                                   |       |       |           | No                                             | No           | Yes          | No                |
| $g(\mathbf{k}^{(l)}, y(\mathbf{k}^{(l)}))$       |       |       |           |                                                |              | \$850.9      |                   |

PROOF.

(a) Taking the partial derivative of the above function with respect to  $y$ , we obtain

$$\begin{aligned} \frac{\partial}{\partial y}(g_i(t_i, k_i, y) - g_i(t_i + 1, k_i, y)) &= [(r_i(t_i, k_i) - c_i(t_i, k_i)) - (r_i(t_i + 1, k_i) - c_i(t_i + 1, k_i))]P(D \geq y) \\ &\quad - [(c_i(t_i, k_i) + H_i(t_i, k_i)) - (c_i(t_i + 1, k_i) + H_i(t_i + 1, k_i))](1 - P(D \geq y)). \end{aligned}$$

If A1 (A2) holds, then the above expression is positive (negative), which implies that  $g_i(t_i, k_i, y) - g_i(t_i + 1, k_i, y)$  is increasing (decreasing) in  $y$ , or, equivalently,  $g_i(t_i, k_i, y)$  is a submodular (supermodular) function of  $t_i$  and  $y$ ,  $i \in E$ .

(b) We have

$$g_i(t_i, 0, y) - g_i(t_i, 1, y) = a_i(t_i)E[\min(y, D)] - b_i(t_i)(y - E[\min(y, D)]),$$

which is increasing (decreasing) in  $t_i$ ,  $i \in E$ , if Assumption B1 (B2) holds.

(c) Recall that  $\beta_i(t_i)$  is the largest solution of (4.13). Under B1 (B2), the RHS of (4.13),  $b_i(t_i)/(a_i(t_i) + b_i(t_i))$ , is decreasing (increasing) in  $t_i$ . Furthermore,  $E[\min(y, D)]/y$  is decreasing in  $y$  since

$$\begin{aligned} \frac{d}{dy} \left( \frac{E[\min(y, D)]}{y} \right) &= \frac{d}{dy} \left( \frac{\int_0^y P(D \geq u) du}{y} \right) = \frac{P(D \geq y)y - \int_0^y P(D \geq u) du}{y^2} \\ &\leq \frac{P(D \geq y)y - P(D \geq y) \int_0^y du}{y^2} = 0. \end{aligned} \tag{EC.D4}$$

Therefore,  $\beta_i(t_i)$  is increasing (decreasing) in  $t_i$  under B1 (B2).  $\square$

## Appendix E. Proof of Theorem 2

(a) Let  $\mathbf{1}_i$  be the vector whose  $i$ -th element is 1 and others 0. It is sufficient to show  $\mathbf{k}^*(\mathbf{t}) \geq \mathbf{k}^*(\mathbf{t} + \mathbf{1}_i)$ . For notational simplicity, denote the optimal solution pair in state  $\mathbf{t}$  by  $(\mathbf{k}^*, y^*)$  and the optimal solution pair in state  $\mathbf{t} + \mathbf{1}_i$  by  $(\bar{\mathbf{k}}, \bar{y})$ . Recall that  $\mathbf{k}^*$  must be one of the dominant configurations  $\mathbf{k}^{(l)}$ ,  $l = 0, 1, \dots, m$ . Without loss of generality, we assume  $\beta_l(t_i)$  is increasing in  $l$  so that  $\beta_{(l)}(t_i) = \beta_l(t_i)$ . Since  $a_i \geq 0$ ,  $i \in E$ , by Theorem 1(1), a dominant configuration in state  $\mathbf{t}$  takes the form  $\mathbf{k}^{(l)}(\mathbf{t}) = (\underbrace{1, 1, \dots, 1}_{\text{first } l \text{ elements}}, 0, 0, \dots, 0)$ ,  $l = 0, 1, \dots, m$ . Let  $\mathbf{k}^* = \mathbf{k}^{(l^*)}(\mathbf{t})$ , i.e.,  $\mathbf{k}^*$  uses G1 technologies for components  $1, 2, \dots, l^*$ , and G0 technologies for components  $l^* + 1, \dots, m$ . We establish our result via contradiction. Suppose  $\bar{\mathbf{k}} \not\leq \mathbf{k}^*$ . This implies that there exists  $l > l^*$ , such that  $k_l^* = 0$  but  $\bar{k}_l = 1$  (i.e., component  $l$  uses G0 in state  $\mathbf{t}$  but G1 in state  $\mathbf{t} + \mathbf{1}_i$ ). Since the optimal order quantity must belong to its dominant interval,

$$\begin{cases} \beta_{l^*}(t_{l^*}) \leq y^* < \beta_{l^*+1}(t_{l^*+1}) \leq \beta_l(t_l) \leq \bar{y} & \text{if } l \neq i, \\ \beta_{l^*}(t_{l^*}) \leq y^* < \beta_{l^*+1}(t_{l^*+1}) \leq \beta_l(t_l) = \beta_i(t_i) \leq \beta_i(t_i + 1) \leq \bar{y}, & \text{if } l = i. \end{cases}$$

In either case,  $y^* < \bar{y}$ . We need to consider two cases.

*Case 1.*  $k_i^* \leq \bar{k}_i$ : We prove the solution pair  $(\bar{\mathbf{k}}, \bar{y})$  outperforms the presumed optimal solution pair  $(\mathbf{k}^*, y^*)$  in state  $\mathbf{t}$ , resulting in a contradiction. We have

$$\begin{aligned} g(\mathbf{t}, \mathbf{k}^*, y^*) - g(\mathbf{t} + \mathbf{1}_i, \bar{\mathbf{k}}, \bar{y}) &\leq g(\mathbf{t}, \mathbf{k}^*, y^*) - g(\mathbf{t} + \mathbf{1}_i, \mathbf{k}^*, y^*) \\ &= g_i(t_i, k_i^*, y^*) - g_i(t_i + 1, k_i^*, y^*) \\ &\leq g_i(t_i, k_i^*, \bar{y}) - g_i(t_i + 1, k_i^*, \bar{y}) \\ &\leq g_i(t_i, \bar{k}_i, \bar{y}) - g_i(t_i + 1, \bar{k}_i, \bar{y}) \\ &= g(\mathbf{t}, \bar{\mathbf{k}}, \bar{y}) - g(\mathbf{t} + \mathbf{1}_i, \bar{\mathbf{k}}, \bar{y}). \end{aligned} \tag{EC.E1}$$

Here, the first inequality follows, because  $(\bar{\mathbf{k}}, \bar{y})$  is the optimal solution pair in state  $\mathbf{t} + \mathbf{1}_i$ . The second inequality is due to Lemma 2(a) under A1. The third inequality uses  $k_i^* \leq \bar{k}_i$  and Lemma 2(b) under B1. However, (EC.E1) yields

$$g(\mathbf{t}, \mathbf{k}^*, y^*) \leq g(\mathbf{t}, \bar{\mathbf{k}}, \bar{y}),$$

which contradicts to the optimality of  $(\mathbf{k}^*, y^*)$  in state  $\mathbf{t}$ .

Case 2.  $k_i^* > \bar{k}_i$ : This means  $k_i^* = 1$  and  $\bar{k}_i = 0$ , that is, component  $i$ , which uses G1 in state  $\mathbf{t}$ , is upgraded to G0 in state  $\mathbf{t} + 1_i$ . Since  $\mathbf{k}^* = \mathbf{k}^{(l^*)}(\mathbf{t})$ ,  $i \leq l^*$ . From Lemma 2(c),  $\beta_i(t_i) \leq \beta_i(t_i + 1)$  under B1. In addition, since  $k_i^* = 1$  and  $\bar{k}_i = 0$ , and  $y^*$  and  $\bar{y}$  belong to their respective dominant intervals, we have  $\beta_i(t_i) \leq y^* < \bar{y} < \beta_i(t_i + 1)$ . Let  $\bar{l}$  be the largest integer such that  $\beta_i(t_i) \leq \bar{y} < \beta_i(t_i + 1)$ ,  $\bar{l} \geq l > l^* \geq i$ . This, however, implies that  $\bar{\mathbf{k}}$  must take the form

$$\bar{\mathbf{k}} = (\underbrace{1, 1, \dots, 1}_{\text{first } i-1 \text{ elements}}, 0, \underbrace{1, 1, \dots, 1}_{i+1 \text{ to } \bar{l} \text{ elements}}, 0, 0, \dots, 0).$$

Let us define

$$\mathbf{k}' = \bar{\mathbf{k}} + 1_i \quad \text{and} \quad \mathbf{k}'' = \mathbf{k}^* - 1_i. \quad (\text{EC.E2})$$

Then, by our assumption, the solution pair  $(\mathbf{k}^*, y^*)$  outperforms the solution pair  $(\mathbf{k}', \bar{y})$  in state  $\mathbf{t}$ , that is,

$$g(\mathbf{t}, \mathbf{k}^*, y^*) \geq g(\mathbf{t}, \mathbf{k}', \bar{y}), \quad (\text{EC.E3})$$

or equivalently,

$$g_i(t_i, 1, y^*) - g_i(t_i, 1, \bar{y}) \geq \sum_{j \neq i} g_j(t_j, k_j', \bar{y}) - \sum_{j \neq i} g_j(t_j, k_j^*, y^*). \quad (\text{EC.E4})$$

On the other hand, the solution pair  $(\bar{\mathbf{k}}, \bar{y})$  outperforms the solution pair  $(\mathbf{k}'', y^*)$  in state  $\mathbf{t} + 1_i$ :

$$g(\mathbf{t} + 1_i, \bar{\mathbf{k}}, \bar{y}) \geq g(\mathbf{t} + 1_i, \mathbf{k}'', y^*), \quad (\text{EC.E5})$$

or equivalently,

$$\sum_{j \neq i} g_j(t_j, \bar{k}_j, \bar{y}) - \sum_{j \neq i} g_j(t_j, k_j'', y^*) \geq g_i(t_i + 1, 0, y^*) - g_i(t_i + 1, 0, \bar{y}). \quad (\text{EC.E6})$$

However, our construction of  $\mathbf{k}'$  and  $\mathbf{k}''$  in (EC.E2) implies that the RHS of (EC.E4) is equal to the LHS of (EC.E6), and thus we have, from (EC.E4) and (EC.E6),

$$\begin{aligned} g_i(t_i, 1, y^*) - g_i(t_i, 1, \bar{y}) &\geq g_i(t_i + 1, 0, y^*) - g_i(t_i + 1, 0, \bar{y}) \\ &\geq g_i(t_i, 0, y^*) - g_i(t_i, 0, \bar{y}), \end{aligned} \quad (\text{EC.E7})$$

where the last inequality is due to Lemma 2(a). Rearranging the above inequality, we obtain

$$g_i(t_i, 0, y^*) - g_i(t_i, 1, y^*) \leq g_i(t_i, 0, \bar{y}) - g_i(t_i, 1, \bar{y}).$$

However, this contradicts Lemma 1(c), which states that  $g_i(t_i, 0, y) - g_i(t_i, 1, y) < 0$  and is decreasing in  $y$  for  $y > \beta_i(t_i)$ . Therefore, we must have  $\bar{\mathbf{k}} \leq \mathbf{k}^*$ .

(b) First note that, from (4.8), we can write

$$g(\mathbf{t}, \mathbf{k}, y) - g(\mathbf{t} + 1_i, \mathbf{k}, y) = g_i(t_i, k_i, y) - g_i(t_i + 1, k_i, y).$$

Then Lemma 2(a) means that  $g(\mathbf{t}, \mathbf{k}, y)$  is a submodular function of  $t_i$  and  $y$ . Hence  $y(\mathbf{t}, \mathbf{k})$  is decreasing in  $t_i$  for any fixed  $\mathbf{k}$  and  $t_l, l \neq i$ . This result means that it is sufficient to show  $y' \equiv y(\mathbf{t}, \bar{\mathbf{k}}) \leq y^*$ , since  $y' \geq \bar{y} \equiv y(\mathbf{t} + 1_i, \bar{\mathbf{k}})$ . Suppose, on the contrary,  $y' > y^*$ . Note that  $\beta_{l^*}(t_{l^*}) < y^*$ . Recall that both functions  $g(\mathbf{t}, \mathbf{k}^*, y)$  and  $g(\mathbf{t}, \bar{\mathbf{k}}, y)$  are concave functions of  $y$ . Since  $g(\mathbf{t}, \mathbf{k}^*, y)$  reaches the maximum at  $y^*$  and  $g(\mathbf{t}, \bar{\mathbf{k}}, y)$  reaches the maximum at  $y'$ ,  $y^* < y'$ ,  $g(\mathbf{t}, \mathbf{k}^*, y)$  is decreasing in  $y$  and  $g(\mathbf{t}, \bar{\mathbf{k}}, y)$  is increasing in  $y$  in the interval  $[y^*, y')$ . This implies that the difference function

$$g(\mathbf{t}, \bar{\mathbf{k}}, y) - g(\mathbf{t}, \mathbf{k}^*, y) = \sum_{\bar{k}_j < k_j^*, j \leq l^*} [g_j(t_j, 0, y) - g_j(t_j, 1, y)]$$

is increasing in  $y$  in the interval  $[y^*, y')$ , with  $y^* \geq \beta_{l^*}(t_{l^*})$ . However, by Lemma 1(c), each term on the RHS of the above expression,  $g_j(t_j, 0, y) - g_j(t_j, 1, y)$ , is decreasing in  $y$  for  $y > \beta(t_{l^*}) \geq \beta(t_j)$ ,  $j \leq l^*$ , resulting in a contradiction. Hence we must have  $\bar{y} \leq y' \leq y^*$ .  $\square$

## Appendix F. Proof of Theorem 3

We truncate  $W^\tau(\mathbf{t}, \mathbf{j}, x)$  to  $W_n^\tau(\mathbf{t}, \mathbf{j}, x)$ , where  $W_n^\tau(\mathbf{t}, \mathbf{j}, x)$  is the  $n$ -period counterpart of  $W^\tau(\mathbf{t}, \mathbf{j}, x)$ . The truncated optimality equation of (5.3) is

$$W_n^\tau(\mathbf{t}, \mathbf{j}, x) = \max_{y \geq 0} \left\{ G^\tau(\mathbf{t}, \mathbf{j}, x, y) + \lambda \sum_{\mathbf{t}'} \sum_{\mathbf{M}} p^{\mathbf{M}}(\mathbf{t}' | \mathbf{t}) E W_{n-1}^\tau(\mathbf{t}', \mathbf{k}(\mathbf{t}) + \mathbf{M}, y - Z^\tau(\mathbf{t}, y)) \right\}. \quad (\text{EC.F1})$$

Using induction, we shall prove both (a) and (b) of Theorem 3 hold for any  $n$ . When  $n = 1$ , the optimality equation becomes

$$\begin{aligned} W_1^\tau(\mathbf{t}, \mathbf{j}, x) &= \max_{y \geq 0} \{ G^\tau(\mathbf{t}, \mathbf{j}, x, y) \} \\ &= \max_{y \geq 0} \left\{ [r^\tau(\mathbf{t}) + H^\tau(\mathbf{t})] E[Z^\tau(\mathbf{t}, y)] - [c^\tau(\mathbf{t}) + H^\tau(\mathbf{t})] y - \sum_{j_i=k_i(\mathbf{t})} \Delta_i(t_i, j_i)(x - y)^+ \right\}. \end{aligned} \quad (\text{EC.F2})$$

From Assumption A0 and (5.2),  $r^\tau(\mathbf{t}) \geq c^\tau(\mathbf{t}) \geq \bar{s}^\tau(\mathbf{t})$ , which implies  $r^\tau(\mathbf{t}) + H^\tau(\mathbf{t}) = r^\tau(\mathbf{t}) + h^\tau(\mathbf{t}) - \bar{s}^\tau(\mathbf{t}) > 0$ . In addition, with positive salvage loss,  $\Delta_i(t_i, j_i) > 0$ . Therefore, each term in (EC.F2), and consequently  $G^\tau(\mathbf{t}, \mathbf{j}, x, y)$ , is concave in  $y$  for fixed  $x$ . From (EC.F2), we find that the first derivative of  $G^\tau(\mathbf{t}, \mathbf{j}, x, y)$  with respect to  $y$  satisfies

$$\frac{\partial G^\tau(\mathbf{t}, \mathbf{j}, x, y)}{\partial y} = \begin{cases} [r^\tau(\mathbf{t}) + H^\tau(\mathbf{t})][1 - F_{\mathbf{t}, \mathbf{k}(\mathbf{t})}(y)] - [c^\tau(\mathbf{t}) + H^\tau(\mathbf{t})], & \text{if } y \geq x, \\ [r^\tau(\mathbf{t}) + H^\tau(\mathbf{t})][1 - F_{\mathbf{t}, \mathbf{k}(\mathbf{t})}(y)] - \left[ c^\tau(\mathbf{t}) + H^\tau(\mathbf{t}) - \sum_{j_i=k_i(\mathbf{t})} \Delta_i(t_i, j_i) \right], & \text{if } y < x. \end{cases} \quad (\text{EC.F3})$$

Setting each of the above expressions to zero, we obtain two base-stock levels of the newsvendor-type:

$$F_{\mathbf{t}, \mathbf{k}(\mathbf{t})}(y_1^\tau(\mathbf{t})) = \frac{r^\tau(\mathbf{t}) - c^\tau(\mathbf{t})}{r^\tau(\mathbf{t}) + H^\tau(\mathbf{t})}, \quad F_{\mathbf{t}, \mathbf{k}(\mathbf{t})}(\bar{y}_1^\tau(\mathbf{t}, \mathbf{j})) = \frac{r^\tau(\mathbf{t}) - c^\tau(\mathbf{t}) + \sum_{j_i=k_i(\mathbf{t})} \Delta_i(t_i, j_i)}{r^\tau(\mathbf{t}) + H^\tau(\mathbf{t})}. \quad (\text{EC.F4})$$

Note that both  $y_1^\tau(\mathbf{t})$  and  $\bar{y}_1^\tau(\mathbf{t}, \mathbf{j})$  are well defined and satisfy  $y_1^\tau(\mathbf{t}) \leq \bar{y}_1^\tau(\mathbf{t}, \mathbf{j})$ , since  $\sum_{j_i=k_i(\mathbf{t})} \Delta_i(t_i, j_i) \geq 0$ . Clearly, if  $x \leq y_1^\tau(\mathbf{t})$ , then  $y_1^\tau(\mathbf{t})$  maximizes  $G^\tau(\mathbf{t}, \mathbf{j}, x, y)$ . If  $x \geq \bar{y}_1^\tau(\mathbf{t}, \mathbf{j})$ , then  $\bar{y}_1^\tau(\mathbf{t}, \mathbf{j})$  maximizes  $G^\tau(\mathbf{t}, \mathbf{j}, x, y)$ . If  $y_1^\tau(\mathbf{t}) < x < \bar{y}_1^\tau(\mathbf{t}, \mathbf{j})$  and  $y < x$ , which implies  $y < \bar{y}_1^\tau(\mathbf{t}, \mathbf{j})$ , then the second expression of (EC.F3) is positive. On the other hand, if  $y_1^\tau(\mathbf{t}) < x < \bar{y}_1^\tau(\mathbf{t}, \mathbf{j})$  and  $y > x$ , which implies  $y > y_1^\tau(\mathbf{t})$ , then the first expression of (EC.F3) is negative. Therefore, if  $y_1^\tau(\mathbf{t}) < x < \bar{y}_1^\tau(\mathbf{t}, \mathbf{j})$ , then  $G^\tau(\mathbf{t}, \mathbf{j}, x, y)$  is maximized at  $x$ . This proves part (a) of Theorem 3 for  $n = 1$ .

Substituting  $y_1^\tau(\mathbf{t})$  and  $\bar{y}_1^\tau(\mathbf{t}, \mathbf{j})$  into (EC.F2), we get

$$W_1^\tau(\mathbf{t}, \mathbf{j}, x) = \begin{cases} G^\tau(\mathbf{t}, \mathbf{j}, 0, y_1^\tau(\mathbf{t})), & \text{if } x \leq y_1^\tau(\mathbf{t}), \\ G^\tau(\mathbf{t}, \mathbf{j}, x, x), & \text{if } y_1^\tau(\mathbf{t}) < x < \bar{y}_1^\tau(\mathbf{t}, \mathbf{j}), \\ G^\tau(\mathbf{t}, \mathbf{j}, \bar{y}_1^\tau(\mathbf{t}, \mathbf{j}), \bar{y}_1^\tau(\mathbf{t}, \mathbf{j})) - s(\mathbf{t}, \mathbf{j})(x - \bar{y}_1^\tau(\mathbf{t}, \mathbf{j})), & \text{if } x \geq \bar{y}_1^\tau(\mathbf{t}, \mathbf{j}). \end{cases}$$

It is seen that  $W_1^\tau(\mathbf{t}, \mathbf{j}, x)$  is concave and nonincreasing in  $x$ . This proves part (b) of Theorem 3 for  $n = 1$ .

Next we show that both parts of Theorem 3 hold for  $n$ , based on the hypothesis that they hold for  $n - 1$ . We first show that  $E W_{n-1}^\tau(\mathbf{t}', \mathbf{k}(\mathbf{t}) + \mathbf{M}, y - Z^\tau(\mathbf{t}, y))$ , given in (EC.F1), is nonincreasing and concave in  $y$ . Recall that  $y - Z^\tau(\mathbf{t}, y) = (y - D^\tau(\mathbf{t}))^+$ , where  $D^\tau(\mathbf{t}) = D(\mathbf{t}, \mathbf{k}(\mathbf{t}))$ , which is a nondecreasing and convex function of  $y$  for each realized  $D^\tau(\mathbf{t})$ . Using the fact that if  $f(y)$  is nonincreasing and concave in  $y$  and  $g(y)$  is nondecreasing and convex in  $y$ , then  $f(g(y))$  is nonincreasing and concave in  $y$ , we conclude via our hypothesis that for every realized  $D^\tau(\mathbf{t}) = d$ ,  $W_{n-1}^\tau(\mathbf{t}', \mathbf{k}(\mathbf{t}) + \mathbf{M}, (y - d)^+)$  is nonincreasing and concave in  $y$ . Since the expectation operator preserves the concavity and nonincreasing property,  $E W_{n-1}^\tau(\mathbf{t}', \mathbf{k}(\mathbf{t}) + \mathbf{M}, (y - D^\tau(\mathbf{t}))^+)$  is nonincreasing and concave in  $y$ . This further implies that the expression within the maximum operator of (EC.F1) is a concave function of  $y$  for given  $\mathbf{j}$  and  $x$ . Repeating the same approach for  $n = 1$ , we can show that the optimal balanced ordering policy is characterized two control limits  $y_n^\tau(\mathbf{t}) \leq \bar{y}_n^\tau(\mathbf{t}, \mathbf{j})$  as follows:

$$y_n^\tau(\mathbf{t}, \mathbf{j}, x) = \begin{cases} y_n^\tau(\mathbf{t}), & \text{if } x \leq y_n^\tau(\mathbf{t}), \\ x, & \text{if } y_n^\tau(\mathbf{t}) < x < \bar{y}_n^\tau(\mathbf{t}, \mathbf{j}), \\ \bar{y}_n^\tau(\mathbf{t}, \mathbf{j}), & \text{if } x \geq \bar{y}_n^\tau(\mathbf{t}, \mathbf{j}). \end{cases}$$

**Table EC.3 Cost Parameters in Example 2**

| Component | Generation-0  |              | Generation-1  |              |
|-----------|---------------|--------------|---------------|--------------|
|           | Profit margin | Overage cost | Profit margin | Overage cost |
| 1         | 11            | 9            | 9.8           | 8            |
| 2         | 11            | 6            | 9.5           | 5            |

This completes the induction step for part (a) of Theorem 3 Substituting  $y_{n+1}^r(\mathbf{t}, \mathbf{j}, x)$  into (EC.F1), and following the similar argument as that for  $n = 1$ , one sees that  $W_n^r(\mathbf{t}, \mathbf{j}, x)$  is nonincreasing and concave function of  $x$ . This completes the induction step for part (b) of Theorem 3. Finally, using the standard convergence property of the discounted DP, we let  $n \rightarrow \infty$  and conclude that both parts of Theorem 3 hold true.  $\square$

### Appendix G. An Example of Extended IPA

EXAMPLE 2. We suppress  $(t_1, t_2)$  in this example. Demand  $D$  follows the uniform distribution between 0 and 10. The initial configuration is  $\mathbf{j} = (1, 1)$  and  $x = 3$ . Cost parameters are summarized in Table EC.3. We assume  $c_i - s_i = 1$  for  $i = 1, 2$ . For component 1,  $\Delta G_1(1, 3, y) = 0$  has three roots:  $y = 1.82, 3.88,$  and  $7.03$  (these roots actually depend on  $x$ ). For component 2,  $\Delta G_2(1, 3, y) = 0$  has a single root,  $y = 9.46$ . The next several steps of IPA are summarized in Table EC.4. As seen, Config-(0, 0) dominates if  $y$  is in interval  $[0, 1.82)$  and  $[3.88, 7.03)$ . According to (5.5), the first limit for Config-(0, 0) is 5.95. Since  $x = 3 < 5.95$ , the optimal inventory level for Config-(0, 0) is 5.95, which happens to belong to  $[3.88, 7.03)$ . Because the pair  $((0, 0), 5.95)$  is the only local optimum, it is also the global optimum. Here, both components are upgraded, which means that the initial inventory  $x = 3$  is salvaged for both components and the new inventory for Config-(0, 0) is brought to the first control limit.

### Appendix H. Proof of Theorem 4

Using the standard induction approach, we truncate  $W(\mathbf{t}, \mathbf{j}, x)$  to  $W_n(\mathbf{t}, \mathbf{j}, x)$ , where  $W_n(\mathbf{t}, \mathbf{j}, x)$  is the  $n$ -period counterpart of  $W(\mathbf{t}, \mathbf{j}, x)$ . When  $n = 1$ ,  $W_1(\mathbf{t}, \mathbf{j}, x) = \max_{\mathbf{k} \in \{0,1\}^m, y \geq 0} \{G(\mathbf{t}, \mathbf{j}, x, \mathbf{k}, y)\}$  is decreasing on  $x$ , by Theorem 3. We assume that  $W_n(\mathbf{t}, \mathbf{j}, x)$  is nonincreasing on  $x$  for some  $n$ . For  $n + 1$ , we write the truncated optimality equation as

$$W_{n+1}(\mathbf{t}, \mathbf{j}, x) = \max_{\mathbf{k} \in \{0,1\}^m, y \geq 0} \{J_{n+1}(\mathbf{t}, \mathbf{j}, x, \mathbf{k}, y)\}, \tag{EC.H1}$$

where

$$J_{n+1}(\mathbf{t}, \mathbf{j}, x, \mathbf{k}, y) = r(\mathbf{t}, \mathbf{k})E[Z(\mathbf{t}, \mathbf{k}, y)] - H(\mathbf{t}, \mathbf{k})(y - E[Z(\mathbf{t}, \mathbf{k}, y)]) - c(\mathbf{t}, \mathbf{k})y - \sum_{j_i=k_i} \Delta_i(t_i, j_i)(x - y)^+ - \sum_{j_i \neq k_i} \Delta_i(t_i, j_i)x + \lambda \sum_{\mathbf{t}'} \sum_{\mathbf{M}} p^{\mathbf{M}}(\mathbf{t}' | \mathbf{t})EW_n(\mathbf{t}', \mathbf{k} + \mathbf{M}, y - Z(\mathbf{t}, \mathbf{k}, y)). \tag{EC.H2}$$

We need to prove that, if the density function  $f(\xi)$  of demand  $D(\mathbf{t}, \mathbf{k})$  is log concave, then  $J_{n+1}(\mathbf{t}, \mathbf{j}, x, \mathbf{k}, y)$  is quasi-concave in  $y$ , with other parameters fixed. We resort to Proposition 3.1 in

**Table EC.4 The Result of Generalized IPA for Example 2**

| Component               | Dominate configurations in sub-intervals |              |              |              |                   |
|-------------------------|------------------------------------------|--------------|--------------|--------------|-------------------|
|                         | [0, 1.82)                                | [1.82, 3.88) | [3.88, 7.03) | [7.03, 9.46) | [9.46, $\infty$ ) |
| 1                       | 0                                        | 1            | 0            | 1            | 1                 |
| 2                       | 0                                        | 0            | 0            | 0            | 1                 |
| Optimal inventory level | 5.95                                     | 6.0          | 5.95         | 6.0          | 6.0               |
| Local optimum?          | No                                       | No           | Yes          | No           | No                |

Cheng and Sethi (1999), which states that if the density function  $f(\xi)$  is log concave and function  $K(y)$  is quasi-concave in  $y$ , then

$$J(y) = \int_0^\infty K(y - \xi)f(\xi) d\xi$$

quasi-concave in  $y$ . To apply the above result, we condition on demand  $D(\mathbf{t}, \mathbf{k}) = \xi$ , and rewrite (EC.H2) as

$$J_{n+1}(\mathbf{t}, \mathbf{j}, x, \mathbf{k}, y) = \int_0^\infty K_{n+1}(y - \xi)f(\xi) d\xi, \quad (\text{EC.H3})$$

where, by (EC.H2),  $K_{n+1}(y)$  satisfies

$$\begin{aligned} K_{n+1}(y) &= [r(\mathbf{t}, \mathbf{k}) - c(\mathbf{t}, \mathbf{k})](y + \xi) - [r(\mathbf{t}, \mathbf{k}) + H(\mathbf{t}, \mathbf{k})]y^+ + \sum_{j_i=k_i} \Delta_i(t_i, j_i) \min(y + \xi - x, 0) \\ &\quad - \sum_{j_i \neq k_i} \Delta_i(t_i, j_i)x + \lambda \sum_{\mathbf{t}'} \sum_{\mathbf{M}} p^{\mathbf{M}}(\mathbf{t}' | \mathbf{t}) W_n(\mathbf{t}', \mathbf{k} + \mathbf{M}, y^+). \end{aligned} \quad (\text{EC.H4})$$

Next, we show  $K_{n+1}(y)$  is increasing on  $y$  when  $y \leq 0$  and decreasing on  $y$  when  $y \geq 0$ , which implies that  $K_{n+1}(y)$  is unimodal (i.e., quasi-concave) on  $y$ , for any given  $\xi$ . We consider three cases.

*Case 1.*  $y \leq 0$ : In this case,  $y^+ = 0$  and (EC.H4) becomes

$$\begin{aligned} K_{n+1}(y) &= [r(\mathbf{t}, \mathbf{k}) - c(\mathbf{t}, \mathbf{k})](y + \xi) + \sum_{j_i=k_i} \Delta_i(t_i, j_i) \min(y + \xi - x, 0) \\ &\quad - \sum_{j_i \neq k_i} \Delta_i(t_i, j_i)x + \lambda \sum_{\mathbf{t}'} \sum_{\mathbf{M}} p^{\mathbf{M}}(\mathbf{t}' | \mathbf{t}) W_n(\mathbf{t}', \mathbf{k} + \mathbf{M}, 0). \end{aligned}$$

It is easily seen that the first and second terms of the above expression are increasing functions of  $y$ , and the third and fourth terms are independent of  $y$ . Therefore  $K_{n+1}(y)$  is an increasing function of  $y$ .

*Case 2.*  $0 \leq y \leq x - \xi$ : We have  $y^+ = y$  and  $\min(y + \xi - x, 0) = y + \xi - x$ . Thus,

$$\begin{aligned} K_{n+1}(y) &= - \left[ r(\mathbf{t}, \mathbf{k}) + H(\mathbf{t}, \mathbf{k}) - \sum_{j_i=k_i} \Delta_i(t_i, j_i) \right] y + \left[ r(\mathbf{t}, \mathbf{k}) - c(\mathbf{t}, \mathbf{k}) + \sum_{j_i=k_i} \Delta_i(t_i, j_i) \right] \xi \\ &\quad - \sum_i \Delta_i(t_i, k_i)x + \lambda \sum_{\mathbf{t}'} \sum_{\mathbf{M}} p^{\mathbf{M}}(\mathbf{t}' | \mathbf{t}) W_n(\mathbf{t}', \mathbf{k} + \mathbf{M}, y). \end{aligned} \quad (\text{EC.H5})$$

Note that

$$\sum_{j_i=k_i} \Delta_i(t_i, j_i) \leq \sum_i \Delta_i(t_i, k_i) = c(\mathbf{t}, \mathbf{k}) - s(\mathbf{t}, \mathbf{k}) \leq c(\mathbf{t}, \mathbf{k}) + H(\mathbf{t}, \mathbf{k}).$$

Hence the first term of (EC.H5) is decreasing on  $y$ . The second and third terms are independent of  $y$ . The last term is a decreasing function of  $y$  by our hypothesis of  $W_n$ . Therefore,  $K_{n+1}(y)$  is decreasing on  $y$  in Case 2.

*Case 3.*  $y \geq 0$  and  $y \geq x - \xi$ : We have  $y^+ = y$  and  $\min(y + \xi - x, 0) = 0$ . Then,

$$K_{n+1}(y) = -[r(\mathbf{t}, \mathbf{k}) + H(\mathbf{t}, \mathbf{k})]y + [r(\mathbf{t}, \mathbf{k}) - c(\mathbf{t}, \mathbf{k})]\xi - \sum_{j_i=k_i} \Delta_i(t_i, k_i)x + \lambda \sum_{\mathbf{t}'} \sum_{\mathbf{M}} p^{\mathbf{M}}(\mathbf{t}' | \mathbf{t}) W_n(\mathbf{t}', \mathbf{k} + \mathbf{M}, y)$$

which is decreasing on  $y$ , by our hypothesis.

Note that  $K_{n+1}(y)$  is continuous at  $y = \xi$  and  $y = x - \xi$ . Therefore,  $K_{n+1}(y)$ , and henceforth  $J_{n+1}(\mathbf{t}, \mathbf{j}, x, \mathbf{k}, y)$ , are strictly quasi-concave in  $y$  for any given  $(\mathbf{t}, \mathbf{j}, x, \mathbf{k})$ .

Now, we characterize the optimal ordering policy for any given  $(\mathbf{t}, \mathbf{j}, x, \mathbf{k})$ . From (EC.H2), we find that

$$\frac{\partial J_{n+1}(\mathbf{t}, \mathbf{j}, x, \mathbf{k}, y)}{\partial y} = \begin{cases} \frac{\partial J_{n+1}(\mathbf{t}, \mathbf{j}, 0, \mathbf{k}, y)}{\partial y} & y \geq x, \\ \frac{\partial J_{n+1}(\mathbf{t}, \mathbf{j}, 0, \mathbf{k}, y)}{\partial y} + \sum_{j_i=k_i} \Delta_i(t_i, j_i) & y < x. \end{cases}$$

It can be seen from (EC.H2) that  $\partial J_{n+1}(\mathbf{t}, \mathbf{j}, 0, \mathbf{k}, y) / \partial y$  is independent of  $\mathbf{j}$  if  $y \geq x$  but dependent on  $\mathbf{j}$  otherwise. Since  $J_{n+1}(\mathbf{t}, \mathbf{j}, 0, \mathbf{k}, y)$  is strictly quasi-concave in  $y$  for any given  $(\mathbf{t}, \mathbf{j}, \mathbf{k})$ , let

$$\begin{cases} y_{n+1}^*(\mathbf{t}, \mathbf{k}) = \arg_y \left\{ \frac{\partial J_{n+1}(\mathbf{t}, \mathbf{j}, 0, \mathbf{k}, y)}{\partial y} = 0 \right\}, \\ \bar{y}_{n+1}^*(\mathbf{t}, \mathbf{j}, \mathbf{k}) = \arg_y \left\{ \frac{\partial J_{n+1}(\mathbf{t}, \mathbf{j}, 0, \mathbf{k}, y)}{\partial y} = - \sum_{j_i=k_i} \Delta_i(t_i, j_i) \right\}. \end{cases} \quad (\text{EC.H6})$$

Repeat the similar argument as in Theorem 3 that establishes the optimality of the two-limit policy for  $n = 1$ , one can show that the optimal inventory policy in state  $(\mathbf{t}, \mathbf{j}, x, \mathbf{k})$  is determined by the two thresholds  $y_{n+1}^*(\mathbf{t}, \mathbf{k})$  and  $\bar{y}_{n+1}^*(\mathbf{t}, \mathbf{j}, \mathbf{k})$ . This completes the induction step for part (a). To complete the induction step for part (b), we note that under the two-limit policy,

$$\max_{y \geq 0} \{J_{n+1}(\mathbf{t}, \mathbf{j}, x, \mathbf{k})\} = \begin{cases} J_{n+1}(\mathbf{t}, \mathbf{j}, 0, \mathbf{k}, y_{n+1}^*(\mathbf{t}, \mathbf{k})) - \sum_{j_i \neq k_i} \Delta_i(t_i, j_i)x, & x \leq y_{n+1}^*(\mathbf{t}, \mathbf{k}), \\ J_{n+1}(\mathbf{t}, \mathbf{j}, 0, \mathbf{k}, x) - \sum_{j_i \neq k_i} \Delta_i(t_i, j_i)x, & y_{n+1}^*(\mathbf{t}, \mathbf{k}) < x < \bar{y}_{n+1}^*(\mathbf{t}, \mathbf{j}, \mathbf{k}), \\ J_{n+1}(\mathbf{t}, \mathbf{j}, 0, \mathbf{k}, \bar{y}_{n+1}^*(\mathbf{t}, \mathbf{j}, \mathbf{k})) - \sum_{j_i \neq k_i} \Delta_i(t_i, j_i)x \\ \quad - \sum_{j_i=k_i} \Delta_i(t_i, j_i)(x - \bar{y}_{n+1}^*(\mathbf{t}, \mathbf{j}, \mathbf{k})), & \bar{y}_{n+1}^*(\mathbf{t}, \mathbf{j}, \mathbf{k}) \leq x. \end{cases}$$

It is seen that  $\max_{y \geq 0} \{J_{n+1}(\mathbf{t}, \mathbf{j}, x, \mathbf{k})\}$  is nonincreasing in  $x$ , and thus,

$$W_{n+1}(\mathbf{t}, \mathbf{j}, x) = \max_{\mathbf{k} \in \{0, 1\}^m, y \geq 0} \{J_{n+1}(\mathbf{t}, \mathbf{j}, x, \mathbf{k})\}$$

is nonincreasing in  $x$ . This completes the induction step for part (b). Finally, using the standard convergence property of the discounted DP, we let  $n \rightarrow \infty$  and conclude that both parts of Theorem 4 holds true.  $\square$

## Reference

Cheng, F., S. Sethi. 1999. A periodic review inventory model with demand influenced by promotion decisions. *Management Sci.* 45 1510–1523.
